# Supplementary material
Source: Royal Society of Chemistry journal article supplement (doi:10.1039/d6nj01220e)
Supplement: d6nj01220e1.pdf [file d6nj01220e1.pdf]

## Supporting Information

### **Rational molecular engineering of pyrene-based D–A– $\pi$ –A–D donor molecules for high-performance photovoltaics**

Tanmoy Kalita<sup>a</sup>, Banashmita Barman<sup>a</sup>, and Dhruva Jyoti Kalita<sup>a\*</sup>

<sup>a</sup>Department of Chemistry, Gauhati University

\*Electronic mail: dhrubajyoti.kalita@gauhati.ac.in

**Table 1: Optimized coordinates of the designed compounds in the gas phase employing the HSEH1PBE/6-31G(d,p) level of theory.**

#### **S1**

| <b>Atoms</b> | <b><u>Coordinates (Å)</u></b> |                 |                 |
|--------------|-------------------------------|-----------------|-----------------|
|              | <b><u>X</u></b>               | <b><u>Y</u></b> | <b><u>Z</u></b> |
| C            | 11.788229                     | 1.632761        | 2.698857        |
| C            | 10.418813                     | 1.590632        | 2.930453        |
| C            | 9.561283                      | 0.939498        | 2.034757        |
| C            | 10.106146                     | 0.316643        | 0.878055        |
| C            | 11.511929                     | 0.357827        | 0.653451        |
| C            | 12.331156                     | 1.022720        | 1.574016        |
| C            | 8.148794                      | 0.863323        | 2.246802        |
| C            | 9.250972                      | -0.348160       | -0.046837       |
| C            | 7.842050                      | -0.375584       | 0.170906        |
| C            | 7.331108                      | 0.236235        | 1.362180        |
| C            | 7.013933                      | -1.040079       | -0.763463       |
| C            | 7.600289                      | -1.686200       | -1.858007       |
| C            | 8.968857                      | -1.662552       | -2.071038       |
| C            | 9.816947                      | -0.990915       | -1.184432       |
| C            | 11.233411                     | -0.934902       | -1.384994       |
| C            | 12.044141                     | -0.287348       | -0.509027       |
| H            | 13.117741                     | -0.251174       | -0.674066       |
| H            | 11.648159                     | -1.425813       | -2.261415       |
| H            | 7.736110                      | 1.318139        | 3.143462        |

|   |            |           |           |
|---|------------|-----------|-----------|
| H | 12.438998  | 2.143352  | 3.402432  |
| H | 9.998588   | 2.064460  | 3.813592  |
| H | 13.403196  | 1.055253  | 1.398691  |
| H | 6.266146   | 0.186441  | 1.557018  |
| H | 6.953760   | -2.188782 | -2.571604 |
| H | 9.392278   | -2.157784 | -2.940674 |
| C | -7.277940  | 1.509906  | -1.517330 |
| C | -8.598099  | 1.871113  | -1.716609 |
| C | -9.628508  | 1.248642  | -1.002512 |
| C | -9.292569  | 0.256942  | -0.038796 |
| C | -7.929196  | -0.108951 | 0.174150  |
| C | -6.918982  | 0.508280  | -0.605378 |
| C | -11.003989 | 1.583940  | -1.210196 |
| C | -10.330273 | -0.366873 | 0.711970  |
| C | -11.692116 | -0.018102 | 0.481246  |
| C | -11.992318 | 0.975504  | -0.504641 |
| C | -12.695004 | -0.652734 | 1.225002  |
| H | -13.733099 | -0.387016 | 1.043879  |
| C | -12.375283 | -1.606844 | 2.183636  |
| C | -11.049296 | -1.946271 | 2.423064  |
| C | -10.014398 | -1.339636 | 1.700386  |
| C | -8.637284  | -1.644203 | 1.934731  |
| C | -7.646731  | -1.058024 | 1.212553  |
| H | -6.611860  | -1.291113 | 1.436419  |
| H | -8.391326  | -2.352216 | 2.721914  |
| H | -11.241672 | 2.341848  | -1.951935 |
| H | -6.497184  | 1.994905  | -2.092656 |
| H | -8.845819  | 2.637402  | -2.446092 |
| H | -13.033330 | 1.237600  | -0.674047 |
| H | -13.166529 | -2.087180 | 2.751432  |
| H | -10.801707 | -2.687328 | 3.178407  |
| S | 0.058046   | -0.167936 | -0.548408 |
| C | 1.174182   | -1.494356 | -0.409124 |
| C | -1.316042  | -1.219135 | -0.377178 |
| C | 0.489065   | -2.680963 | -0.208315 |

|   |           |           |           |
|---|-----------|-----------|-----------|
| C | -0.902397 | -2.527354 | -0.190504 |
| C | 4.710252  | 0.053378  | -0.582023 |
| C | 3.267639  | -0.061111 | -0.515979 |
| C | 5.544138  | -1.107126 | -0.630226 |
| C | 2.615963  | -1.338716 | -0.496001 |
| C | 4.874663  | -2.312956 | -0.638781 |
| C | 3.467132  | -2.427562 | -0.574586 |
| C | -2.690517 | -0.754985 | -0.437938 |
| C | -3.056426 | 0.630098  | -0.379011 |
| C | -4.442076 | 1.051218  | -0.425848 |
| C | -5.505606 | 0.098021  | -0.524731 |
| C | -3.753778 | -1.633119 | -0.560956 |
| C | -5.104634 | -1.221947 | -0.596726 |
| S | 3.809313  | 2.257859  | -0.566326 |
| S | -3.093280 | 3.007431  | -0.241684 |
| N | 5.134169  | 1.318657  | -0.620485 |
| N | 2.648601  | 1.117898  | -0.496930 |
| N | -2.201745 | 1.646135  | -0.275631 |
| N | -4.587597 | 2.376297  | -0.351676 |
| H | 5.459879  | -3.226994 | -0.685807 |
| H | 3.046396  | -3.427294 | -0.593367 |
| H | 0.979478  | -3.634642 | -0.053754 |
| H | -1.586396 | -3.350118 | -0.019303 |
| H | -3.552002 | -2.694587 | -0.659111 |
| H | -5.864831 | -1.987759 | -0.717853 |

## S2

|   |            |          |          |
|---|------------|----------|----------|
| C | -17.866359 | 4.091743 | 1.612969 |
| C | -16.521138 | 3.907583 | 1.907722 |
| C | -15.782502 | 2.898569 | 1.276850 |
| C | -16.422738 | 2.057124 | 0.325318 |
| C | -17.804568 | 2.248063 | 0.036508 |
| C | -18.503110 | 3.271606 | 0.688891 |
| C | -14.402648 | 2.664614 | 1.569891 |

|   |            |           |           |
|---|------------|-----------|-----------|
| C | -15.688265 | 1.027957  | -0.330818 |
| C | -14.299310 | 0.848711  | -0.056146 |
| C | -13.698139 | 1.688007  | 0.940211  |
| C | -13.587347 | -0.171533 | -0.732822 |
| C | -14.277027 | -1.012110 | -1.615358 |
| C | -15.626138 | -0.844621 | -1.878081 |
| C | -16.353638 | 0.177887  | -1.258849 |
| C | -17.743302 | 0.390281  | -1.528145 |
| C | -18.437112 | 1.382188  | -0.912373 |
| H | -19.491583 | 1.533683  | -1.127359 |
| H | -18.234460 | -0.265226 | -2.242416 |
| H | -13.923688 | 3.280715  | 2.326502  |
| H | -18.424919 | 4.879332  | 2.109835  |
| H | -16.027909 | 4.546210  | 2.635639  |
| H | -19.556378 | 3.417089  | 0.464178  |
| H | -12.660675 | 1.517170  | 1.205241  |
| H | -13.721222 | -1.790227 | -2.130224 |
| H | -16.127801 | -1.500713 | -2.584282 |
| C | 13.459690  | 3.107493  | 0.314290  |
| C | 14.732430  | 3.648401  | 0.378369  |
| C | 15.860834  | 2.846330  | 0.175756  |
| C | 15.677027  | 1.467195  | -0.125971 |
| C | 14.363512  | 0.913739  | -0.199588 |
| C | 13.247334  | 1.748088  | 0.051887  |
| C | 17.189404  | 3.372112  | 0.259519  |
| C | 16.816784  | 0.645099  | -0.357905 |
| C | 18.128148  | 1.193740  | -0.265214 |
| C | 18.274481  | 2.582164  | 0.052749  |
| C | 19.233047  | 0.363185  | -0.489407 |
| H | 20.232249  | 0.783896  | -0.414569 |
| C | 19.062380  | -0.979601 | -0.805444 |
| C | 17.787147  | -1.521779 | -0.907049 |
| C | 16.653485  | -0.728997 | -0.687940 |
| C | 15.325119  | -1.245249 | -0.805282 |
| C | 14.236356  | -0.464372 | -0.578020 |

|   |            |           |           |
|---|------------|-----------|-----------|
| H | 13.241993  | -0.878166 | -0.704329 |
| H | 15.198955  | -2.284363 | -1.098167 |
| H | 17.311144  | 4.426183  | 0.494483  |
| H | 12.597132  | 3.738191  | 0.508250  |
| H | 14.863893  | 4.703073  | 0.604641  |
| H | 19.277935  | 2.993846  | 0.121186  |
| H | 19.931236  | -1.607852 | -0.977257 |
| H | 17.656919  | -2.570373 | -1.160953 |
| S | -0.062978  | -1.064072 | 0.096085  |
| C | -1.224336  | -2.355573 | 0.130961  |
| C | 1.281915   | -2.160551 | 0.185100  |
| C | -0.576161  | -3.570006 | 0.225099  |
| C | 0.827829   | -3.461372 | 0.254955  |
| H | -1.102196  | -4.517686 | 0.231833  |
| H | 1.495063   | -4.314684 | 0.287656  |
| C | -12.134333 | -0.381364 | -0.559709 |
| C | -11.228263 | 0.681141  | -0.709538 |
| C | -9.879227  | 0.422823  | -0.572609 |
| C | -9.352145  | -0.857790 | -0.273890 |
| C | -11.630897 | -1.663703 | -0.297978 |
| C | -10.270218 | -1.908208 | -0.151689 |
| C | -7.893582  | -0.736367 | -0.240066 |
| C | -7.614607  | 0.718737  | -0.567476 |
| C | -6.896359  | -1.639296 | 0.055263  |
| C | -5.438561  | -1.553486 | -0.018180 |
| C | -7.178672  | -3.018138 | 0.621782  |
| C | -4.912245  | -2.776682 | 0.470113  |
| C | -4.514579  | -0.608462 | -0.481983 |
| C | -3.155031  | -0.881835 | -0.434533 |
| C | -2.653311  | -2.090435 | 0.075175  |
| C | -3.564858  | -3.057703 | 0.536323  |
| N | -8.838846  | 1.319018  | -0.721535 |
| N | -5.954719  | -3.597036 | 0.851830  |
| O | -6.561801  | 1.322837  | -0.661008 |
| O | -8.232322  | -3.567677 | 0.883220  |

|   |            |           |           |
|---|------------|-----------|-----------|
| H | -11.582332 | 1.676135  | -0.960628 |
| H | -12.329785 | -2.485216 | -0.174725 |
| H | -9.916725  | -2.901875 | 0.078497  |
| H | -4.866082  | 0.335942  | -0.868940 |
| H | -2.462330  | -0.140699 | -0.821967 |
| H | -3.215856  | -3.994198 | 0.958734  |
| C | 2.973011   | -0.409011 | -0.328203 |
| C | 4.286873   | 0.006252  | -0.293228 |
| C | 2.653963   | -1.677612 | 0.186480  |
| C | 5.344124   | -0.774433 | 0.237606  |
| C | 3.689228   | -2.474840 | 0.703840  |
| C | 5.007632   | -2.043478 | 0.728187  |
| C | 6.582341   | -0.015823 | 0.064804  |
| C | 6.160369   | 1.267731  | -0.626829 |
| C | 7.883407   | -0.268137 | 0.440069  |
| C | 9.138683   | 0.437486  | 0.175838  |
| C | 8.268217   | -1.425404 | 1.343068  |
| C | 10.165929  | -0.244286 | 0.873689  |
| C | 9.523071   | 1.537667  | -0.600792 |
| C | 10.856181  | 1.928416  | -0.641340 |
| C | 11.855764  | 1.249362  | 0.070096  |
| C | 11.493428  | 0.133845  | 0.842535  |
| N | 4.797234   | 1.194716  | -0.773971 |
| N | 9.618410   | -1.311119 | 1.559289  |
| H | 2.207147   | 0.220744  | -0.771223 |
| H | 3.450297   | -3.444311 | 1.127871  |
| H | 5.777204   | -2.671961 | 1.150254  |
| H | 8.777596   | 2.085985  | -1.156247 |
| H | 11.137697  | 2.776982  | -1.257087 |
| H | 12.237982  | -0.398874 | 1.425784  |
| O | 7.586406   | -2.300331 | 1.845041  |
| O | 6.815090   | 2.229458  | -0.983056 |
| H | -8.921012  | 2.296494  | -0.946979 |
| H | -5.875964  | -4.523641 | 1.236712  |
| H | 4.274049   | 1.938474  | -1.205427 |

H 10.116010 -1.966787 2.138515

**S3**

C 11.831741 -0.144963 -3.128151  
C 10.460735 -0.266664 -3.319002  
C 9.588254 -0.323615 -2.224979  
C 10.120004 -0.257000 -0.907258  
C 11.527068 -0.139625 -0.721319  
C 12.361404 -0.082527 -1.844437  
C 8.172504 -0.458212 -2.381879  
C 9.249850 -0.310981 0.219074  
C 7.840803 -0.411084 0.031645  
C 7.341294 -0.499989 -1.308861  
C 6.996167 -0.457060 1.163332  
C 7.564189 -0.443130 2.440966  
C 8.934604 -0.346635 2.627704  
C 9.799776 -0.268512 1.531841  
C 11.218343 -0.152164 1.689373  
C 12.044199 -0.086627 0.613510  
H 13.118960 0.003450 0.747771  
H 11.622143 -0.116476 2.697805  
H 7.769509 -0.530748 -3.388712  
H 12.494297 -0.100301 -3.987434  
H 10.050840 -0.318851 -4.324191  
H 13.434612 0.009871 -1.700056  
H 6.273152 -0.612487 -1.457380  
H 6.904799 -0.480215 3.303483  
H 9.345887 -0.320753 3.633254  
C -7.377120 1.854610 1.077055  
C -8.718526 2.179264 1.173989  
C -9.701474 1.331170 0.651105  
C -9.296553 0.136147 -0.006486  
C -7.911619 -0.194141 -0.110867  
C -6.950036 0.670880 0.463450

|   |            |           |           |
|---|------------|-----------|-----------|
| C | -11.096811 | 1.631372  | 0.756535  |
| C | -10.285221 | -0.727607 | -0.558953 |
| C | -11.667750 | -0.406451 | -0.436522 |
| C | -12.038231 | 0.799696  | 0.240221  |
| C | -12.621291 | -1.275513 | -0.981639 |
| H | -13.675296 | -1.029212 | -0.884018 |
| C | -12.233219 | -2.435951 | -1.640607 |
| C | -10.886721 | -2.753674 | -1.771995 |
| C | -9.899163  | -1.915518 | -1.239984 |
| C | -8.503275  | -2.198689 | -1.371081 |
| C | -7.558915  | -1.380537 | -0.837614 |
| H | -6.508353  | -1.611955 | -0.975302 |
| H | -8.206137  | -3.086237 | -1.923779 |
| H | -11.388474 | 2.547047  | 1.264175  |
| H | -6.631982  | 2.518539  | 1.501010  |
| H | -9.020031  | 3.096911  | 1.671892  |
| H | -13.094696 | 1.038811  | 0.329163  |
| H | -12.987014 | -3.096897 | -2.057999 |
| H | -10.586122 | -3.658786 | -2.293027 |
| S | 0.052151   | 0.297813  | 0.514712  |
| C | 1.193980   | -0.961118 | 0.894114  |
| C | -1.305388  | -0.766287 | 0.759230  |
| C | 0.531362   | -2.150640 | 1.140406  |
| C | -0.863702  | -2.041942 | 1.064588  |
| H | 1.037790   | -3.087053 | 1.342943  |
| H | -1.526114  | -2.887869 | 1.205279  |
| C | 5.521857   | -0.553129 | 1.055493  |
| C | 4.735369   | 0.478271  | 0.463786  |
| C | 3.311060   | 0.364826  | 0.411356  |
| C | 2.640784   | -0.778626 | 0.953301  |
| C | 4.842995   | -1.624904 | 1.605168  |
| C | 3.445283   | -1.733604 | 1.561223  |
| C | -3.125154  | 0.888070  | 0.107708  |
| C | -4.511721  | 1.230239  | 0.018293  |
| C | -2.704374  | -0.363254 | 0.660964  |

|   |           |           |           |
|---|-----------|-----------|-----------|
| C | -5.511901 | 0.328339  | 0.489833  |
| C | -3.712888 | -1.200905 | 1.120870  |
| C | -5.070605 | -0.867572 | 1.031101  |
| C | 4.604218  | 2.518698  | -0.544631 |
| C | 3.197419  | 2.402188  | -0.610475 |
| C | -2.578031 | 2.890211  | -0.843022 |
| C | -3.947726 | 3.218836  | -0.948191 |
| N | 5.357439  | 1.582255  | -0.022034 |
| N | 2.570516  | 1.350694  | -0.142830 |
| N | -2.182028 | 1.750548  | -0.331934 |
| N | -4.892231 | 2.412014  | -0.529625 |
| H | 5.103132  | 3.405930  | -0.931000 |
| H | 2.593538  | 3.191492  | -1.054274 |
| H | 5.414815  | -2.415521 | 2.082642  |
| H | 2.985351  | -2.596742 | 2.030070  |
| H | -3.451197 | -2.140900 | 1.594093  |
| H | -5.804124 | -1.562551 | 1.429031  |
| H | -1.810796 | 3.579215  | -1.191196 |
| H | -4.255869 | 4.164909  | -1.390361 |

#### S4

|   |            |           |           |
|---|------------|-----------|-----------|
| C | -11.611495 | 2.636576  | 2.133769  |
| C | -10.236821 | 2.610962  | 2.334334  |
| C | -9.431013  | 1.691273  | 1.651360  |
| C | -10.034033 | 0.776486  | 0.744410  |
| C | -11.445120 | 0.804592  | 0.551834  |
| C | -12.211282 | 1.743419  | 1.253620  |
| C | -8.015189  | 1.624895  | 1.842965  |
| C | -9.232010  | -0.165135 | 0.037949  |
| C | -7.817528  | -0.182387 | 0.219899  |
| C | -7.247815  | 0.732965  | 1.164608  |
| C | -7.041847  | -1.125112 | -0.495396 |
| C | -7.686061  | -2.042298 | -1.334191 |
| C | -9.059961  | -2.029694 | -1.510346 |

|   |            |           |           |
|---|------------|-----------|-----------|
| C | -9.856296  | -1.093004 | -0.843257 |
| C | -11.276458 | -1.043143 | -1.017131 |
| C | -12.036478 | -0.134130 | -0.353758 |
| H | -13.113598 | -0.106398 | -0.496130 |
| H | -11.736132 | -1.754757 | -1.697997 |
| H | -7.558408  | 2.305935  | 2.556345  |
| H | -12.221912 | 3.356979  | 2.670153  |
| H | -9.771764  | 3.306768  | 3.027626  |
| H | -13.287330 | 1.764566  | 1.102576  |
| H | -6.178998  | 0.700036  | 1.339722  |
| H | -7.079718  | -2.757756 | -1.881979 |
| H | -9.528567  | -2.743098 | -2.182933 |
| C | 7.150169   | 1.354189  | -1.762248 |
| C | 8.450012   | 1.742457  | -2.032129 |
| C | 9.511961   | 1.295107  | -1.237850 |
| C | 9.227924   | 0.458934  | -0.121654 |
| C | 7.885129   | 0.066289  | 0.162316  |
| C | 6.843351   | 0.496881  | -0.696665 |
| C | 10.868522  | 1.658634  | -1.511721 |
| C | 10.297075  | 0.019909  | 0.711205  |
| C | 11.639197  | 0.393543  | 0.413299  |
| C | 11.887534  | 1.224504  | -0.725734 |
| C | 12.673827  | -0.057837 | 1.242289  |
| H | 13.696815  | 0.226217  | 1.010170  |
| C | 12.403889  | -0.854878 | 2.348434  |
| C | 11.097222  | -1.216519 | 2.652876  |
| C | 10.031854  | -0.790976 | 1.849513  |
| C | 8.672198   | -1.121538 | 2.143663  |
| C | 7.652049   | -0.712397 | 1.344616  |
| H | 6.630238   | -0.956364 | 1.612470  |
| H | 8.463781   | -1.701969 | 3.038706  |
| H | 11.066450  | 2.294806  | -2.370365 |
| H | 6.343692   | 1.700423  | -2.399552 |
| H | 8.657378   | 2.391281  | -2.878849 |
| H | 12.913764  | 1.506160  | -0.946333 |

|   |           |           |           |
|---|-----------|-----------|-----------|
| H | 13.219063 | -1.194361 | 2.980510  |
| H | 10.888731 | -1.834113 | 3.522476  |
| S | -0.090112 | -0.339460 | -0.514993 |
| C | -1.199891 | -1.637094 | -0.185377 |
| C | 1.291479  | -1.346319 | -0.200467 |
| C | -0.506407 | -2.783649 | 0.160212  |
| C | 0.885794  | -2.620983 | 0.153060  |
| H | -0.990052 | -3.717270 | 0.421823  |
| H | 1.575996  | -3.413965 | 0.415723  |
| C | -5.570786 | -1.202482 | -0.387174 |
| C | -4.697279 | -0.116802 | -0.662068 |
| C | -3.280655 | -0.250980 | -0.604713 |
| C | -2.641303 | -1.476714 | -0.264347 |
| C | -4.925735 | -2.388626 | -0.080900 |
| C | -3.522139 | -2.521754 | -0.015689 |
| C | 2.998746  | 0.502673  | -0.504815 |
| C | 4.347707  | 0.944611  | -0.616311 |
| C | 2.656271  | -0.866721 | -0.321426 |
| C | 5.448656  | 0.048663  | -0.538189 |
| C | 3.751509  | -1.719885 | -0.269903 |
| C | 5.088114  | -1.279418 | -0.369778 |
| N | -4.984653 | 1.145550  | -1.036265 |
| N | -2.733457 | 0.931439  | -0.938286 |
| H | -5.532453 | -3.262072 | 0.140663  |
| H | -3.125258 | -3.496273 | 0.248272  |
| H | 3.583514  | -2.787131 | -0.170029 |
| H | 5.872330  | -2.029973 | -0.346612 |
| N | -3.791165 | 1.675980  | -1.170140 |
| H | -3.687239 | 2.639483  | -1.451277 |
| N | 2.195194  | 1.576972  | -0.597393 |
| N | 4.338279  | 2.283136  | -0.774205 |
| N | 3.054333  | 2.558617  | -0.753976 |
| H | 2.732235  | 3.509836  | -0.851384 |

**S5**

|   |            |           |           |
|---|------------|-----------|-----------|
| C | -12.159881 | 2.060951  | 1.233689  |
| C | -10.817425 | 2.373419  | 1.409708  |
| C | -9.816561  | 1.473488  | 1.022512  |
| C | -10.186912 | 0.227919  | 0.444052  |
| C | -11.565472 | -0.086533 | 0.274181  |
| C | -12.532104 | 0.844614  | 0.673074  |
| C | -8.424999  | 1.754486  | 1.199594  |
| C | -9.184655  | -0.701041 | 0.042707  |
| C | -7.805014  | -0.380221 | 0.201387  |
| C | -7.468335  | 0.872706  | 0.810171  |
| C | -6.828959  | -1.317997 | -0.205601 |
| C | -7.238863  | -2.552304 | -0.720945 |
| C | -8.579476  | -2.867437 | -0.876535 |
| C | -9.573322  | -1.954344 | -0.510435 |
| C | -10.966524 | -2.244234 | -0.669632 |
| C | -11.919262 | -1.351021 | -0.298006 |
| H | -12.973242 | -1.583732 | -0.425127 |
| H | -11.246275 | -3.203225 | -1.097650 |
| H | -8.143577  | 2.696629  | 1.662704  |
| H | -12.923460 | 2.770406  | 1.538417  |
| H | -10.530494 | 3.323347  | 1.852864  |
| H | -13.583364 | 0.603134  | 0.540358  |
| H | -6.422010  | 1.108495  | 0.968508  |
| H | -6.479747  | -3.265150 | -1.030087 |
| H | -8.867053  | -3.828261 | -1.294670 |
| C | 7.326051   | 2.115489  | 0.920440  |
| C | 8.667504   | 2.405661  | 1.093869  |
| C | 9.649925   | 1.447721  | 0.817069  |
| C | 9.247152   | 0.173126  | 0.329444  |
| C | 7.862818   | -0.123557 | 0.146719  |
| C | 6.898269   | 0.859736  | 0.472337  |
| C | 11.043254  | 1.714276  | 1.006250  |
| C | 10.237661  | -0.803680 | 0.023870  |
| C | 11.617716  | -0.512655 | 0.223460  |

|   |           |           |           |
|---|-----------|-----------|-----------|
| C | 11.984976 | 0.776572  | 0.726030  |
| C | 12.572601 | -1.491579 | -0.079007 |
| H | 13.624540 | -1.267491 | 0.076831  |
| C | 12.188450 | -2.732399 | -0.573234 |
| C | 10.845014 | -3.022985 | -0.778041 |
| C | 9.856025  | -2.075340 | -0.486777 |
| C | 8.465273  | -2.330763 | -0.701274 |
| C | 7.518214  | -1.403417 | -0.403193 |
| H | 6.474554  | -1.622374 | -0.600280 |
| H | 8.174929  | -3.289407 | -1.123109 |
| H | 11.332966 | 2.691851  | 1.382491  |
| H | 6.579734  | 2.867278  | 1.153076  |
| H | 8.968224  | 3.383646  | 1.459824  |
| H | 13.039707 | 0.991675  | 0.875832  |
| H | 12.943101 | -3.478609 | -0.803131 |
| H | 10.548219 | -3.992436 | -1.169293 |
| S | -0.033686 | 0.322985  | -0.231730 |
| C | -1.144795 | -0.839783 | 0.429374  |
| C | 1.311336  | -0.459899 | 0.544068  |
| C | -0.484572 | -1.774563 | 1.209579  |
| C | 0.895569  | -1.561816 | 1.273211  |
| H | -1.019173 | -2.575576 | 1.703872  |
| H | 1.599536  | -2.172614 | 1.823749  |
| N | -5.375827 | 0.845483  | -1.542267 |
| N | -2.593570 | 1.075920  | -1.212446 |
| C | -4.674718 | 1.782149  | -2.131920 |
| C | -3.274052 | 1.907256  | -1.963459 |
| C | -4.693869 | -0.020928 | -0.747486 |
| C | -3.283613 | 0.093175  | -0.595113 |
| C | -5.376664 | -1.072388 | -0.077178 |
| C | -4.581307 | -1.933045 | 0.663624  |
| N | -3.251535 | -1.843286 | 0.811058  |
| C | -2.585485 | -0.862418 | 0.213821  |
| H | -5.053946 | -2.758979 | 1.192171  |
| N | 2.250226  | 1.862023  | -0.933589 |

|   |           |           |           |
|---|-----------|-----------|-----------|
| N | 4.988110  | 2.490542  | -1.002616 |
| C | 2.707043  | 2.895996  | -1.596995 |
| C | 4.088077  | 3.205889  | -1.631505 |
| C | 3.150828  | 1.100950  | -0.275772 |
| C | 4.538581  | 1.417303  | -0.300255 |
| C | 5.450095  | 0.582906  | 0.405054  |
| C | 2.705374  | -0.047147 | 0.456270  |
| N | 3.582062  | -0.802406 | 1.108310  |
| C | 4.885090  | -0.491492 | 1.078485  |
| H | 5.532422  | -1.149395 | 1.655059  |
| H | 4.441021  | 4.065283  | -2.199559 |
| H | 1.986169  | 3.513891  | -2.128346 |
| H | -2.724227 | 2.702597  | -2.462423 |
| H | -5.212200 | 2.478534  | -2.773681 |

## **S6**

|   |           |           |           |
|---|-----------|-----------|-----------|
| C | 8.166823  | 5.476745  | -1.365151 |
| C | 7.131125  | 4.659669  | -1.800534 |
| C | 6.918763  | 3.403333  | -1.218466 |
| C | 7.774121  | 2.964713  | -0.170347 |
| C | 8.839307  | 3.806291  | 0.262240  |
| C | 9.013188  | 5.055764  | -0.346172 |
| C | 5.882535  | 2.523390  | -1.657299 |
| C | 7.571828  | 1.692000  | 0.437163  |
| C | 6.493602  | 0.855569  | 0.017164  |
| C | 5.683553  | 1.312115  | -1.073349 |
| C | 6.300562  | -0.396737 | 0.659225  |
| C | 7.214216  | -0.803926 | 1.646357  |
| C | 8.267445  | -0.000312 | 2.036309  |
| C | 8.460539  | 1.262297  | 1.462528  |
| C | 9.523088  | 2.125195  | 1.875886  |
| C | 9.703357  | 3.345037  | 1.305629  |
| H | 10.513877 | 3.992055  | 1.630383  |
| H | 10.188259 | 1.780370  | 2.663068  |
| H | 5.255567  | 2.834909  | -2.488537 |

|   |            |           |           |
|---|------------|-----------|-----------|
| H | 8.318333   | 6.448433  | -1.825561 |
| H | 6.474671   | 4.987628  | -2.602006 |
| H | 9.824960   | 5.695946  | -0.011252 |
| H | 4.908027   | 0.662022  | -1.461067 |
| H | 7.070330   | -1.768768 | 2.117737  |
| H | 8.946068   | -0.339020 | 2.814368  |
| C | -5.043717  | 1.791726  | -1.422324 |
| C | -5.871162  | 2.894173  | -1.533355 |
| C | -7.090257  | 2.945885  | -0.847049 |
| C | -7.450452  | 1.855926  | -0.004722 |
| C | -6.591748  | 0.724307  | 0.121417  |
| C | -5.387044  | 0.688238  | -0.625860 |
| C | -7.979242  | 4.060519  | -0.965846 |
| C | -8.674076  | 1.910437  | 0.722425  |
| C | -9.542000  | 3.031282  | 0.584069  |
| C | -9.154627  | 4.100093  | -0.285959 |
| C | -10.742884 | 3.058439  | 1.304099  |
| H | -11.404323 | 3.913609  | 1.193732  |
| C | -11.088067 | 2.012118  | 2.151436  |
| C | -10.242770 | 0.919458  | 2.300564  |
| C | -9.033634  | 0.848545  | 1.597291  |
| C | -8.129335  | -0.249617 | 1.739878  |
| C | -6.967257  | -0.308614 | 1.039271  |
| H | -6.297867  | -1.148623 | 1.176725  |
| H | -8.388097  | -1.045066 | 2.433715  |
| H | -7.691175  | 4.880707  | -1.618042 |
| H | -4.121102  | 1.755082  | -1.994494 |
| H | -5.586241  | 3.723653  | -2.174656 |
| H | -9.821840  | 4.951934  | -0.387419 |
| H | -12.022708 | 2.050728  | 2.702931  |
| H | -10.512635 | 0.106102  | 2.968826  |
| S | 0.328010   | -1.255909 | -0.181947 |
| C | 1.477237   | -2.568330 | -0.148617 |
| C | -1.010954  | -2.348317 | -0.422648 |
| C | 0.828123   | -3.780731 | -0.321090 |

|   |           |           |           |
|---|-----------|-----------|-----------|
| C | -0.560139 | -3.657815 | -0.474951 |
| C | 5.188520  | -1.295246 | 0.369120  |
| C | 2.876971  | -2.343107 | 0.040092  |
| C | 5.211722  | -2.691495 | 0.289456  |
| C | 3.914887  | -3.286001 | 0.095427  |
| C | -2.357878 | -1.879436 | -0.533255 |
| C | -4.479643 | -0.455788 | -0.588684 |
| C | -3.525975 | -2.622771 | -0.765451 |
| C | -4.717951 | -1.814222 | -0.801374 |
| H | 1.375306  | -4.714520 | -0.329724 |
| H | -1.245241 | -4.482453 | -0.623541 |
| S | 3.547733  | -0.764574 | 0.234333  |
| S | -2.785780 | -0.215898 | -0.356970 |
| N | 6.335890  | -3.455259 | 0.358646  |
| N | 3.759398  | -4.628984 | -0.023205 |
| N | -3.574244 | -3.965262 | -0.960095 |
| N | -5.936728 | -2.359245 | -1.068220 |
| C | 6.147814  | -4.743837 | 0.242129  |
| C | 4.860424  | -5.332599 | 0.052082  |
| C | -4.762983 | -4.457818 | -1.198369 |
| C | -5.941750 | -3.651616 | -1.260369 |
| H | 7.027041  | -5.384217 | 0.291229  |
| H | 4.771751  | -6.413750 | -0.037662 |
| H | -4.837946 | -5.532035 | -1.357331 |
| H | -6.899847 | -4.120970 | -1.478057 |

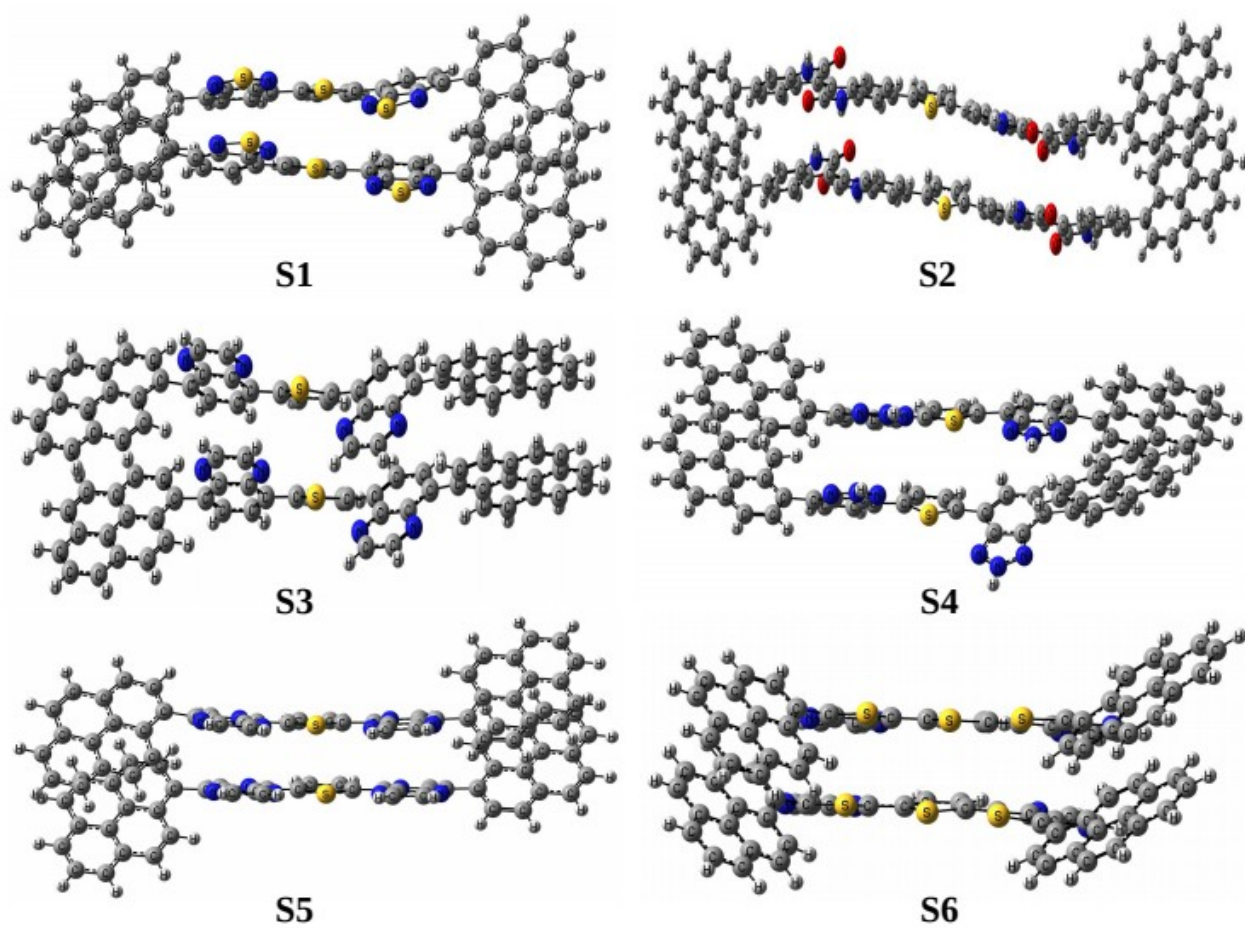

Fig. 1: Structural representations of the optimized  $\pi$ -stacked dimers of the studied compounds.
